# Supplementary material for: LIX1-mediated changes in mitochondrial metabolism control the fate of digestive mesenchyme-derived cells
Source: PubMed Central journal article supplement — Redox Biol. 2022 Aug 13;56:102431. doi: 10.1016/j.redox.2022.102431 (PMC9420520; doi:10.1016/j.redox.2022.102431), 2022-08-13
Supplement: mmc7.pdf [file mmc7.pdf]

**Supplementary Table 1: Oligonucleotides for LIX1 site directed mutagenesis**

|                    |                                           |
|--------------------|-------------------------------------------|
| hLIX1 C83S for     | GCTGTTTTGGCAACTTTCAGTcCTGCTTAAGTAGAGCCGAG |
| hLIX1 C83S rev     | GCCTCGGCTCTACTTAAGCAGgACTGAAAGTTGCCAAAACA |
| hLIX1 C84S for     | GCTGTTTTGGCAACTTTCAGTGCTcCTTAAGTAGAGCCGAG |
| hLIX1 C84S rev     | GCCTCGGCTCTACTTAAGgAGGACTGAAAGTTGCCAAAACA |
| hLIX1 C83SC84S for | GCTGTTTTGGCAACTTTCAGTcCTcCTTAAGTAGAGCCGAG |
| hLIX1 C83SC84S rev | GCCTCGGCTCTACTTAAGgAGgACTGAAAGTTGCCAAAACA |
| hLIX1 C83S for     | GCTGTTTTGGCAACTTTCAGTcCTGCTTAAGTAGAGCCGAG |
| hLIX1 C83S rev     | GCCTCGGCTCTACTTAAGCAGgACTGAAAGTTGCCAAAACA |
| hLIX1 C84S for     | GCTGTTTTGGCAACTTTCAGTGCTcCTTAAGTAGAGCCGAG |
| hLIX1 C84S rev     | GCCTCGGCTCTACTTAAGgAGGACTGAAAGTTGCCAAAACA |
| hLIX1 C83SC84S for | GCTGTTTTGGCAACTTTCAGTcCTcCTTAAGTAGAGCCGAG |
| hLIX1 C83SC84S rev | GCCTCGGCTCTACTTAAGgAGgACTGAAAGTTGCCAAAACA |
