# Supplementary material for: LIX1-mediated changes in mitochondrial metabolism control the fate of digestive mesenchyme-derived cells
Source: PubMed Central journal article supplement — Redox Biol. 2022 Aug 13;56:102431. doi: 10.1016/j.redox.2022.102431 (PMC9420520; doi:10.1016/j.redox.2022.102431), 2022-08-13
Supplement: mmc8.pdf [file mmc8.pdf]

**Supplementary Table 2: List of antibodies.**

- Rabbit polyclonal anti-LIX1 antibody (Aviva Systems Biology Cat# ARP53147\_P050, RRID:AB\_2045922): western blotting (WB) and immunofluorescence (IF)
- Rabbit polyclonal anti-YAP1/TAZ antibody (D24E4 Cell Signaling Cat# 8418, RRID:AB\_10950494)
- Rabbit polyclonal anti-DRP-1 antibody (Santa Cruz Biotechnology Cat# sc-32898, RRID:AB\_2093533)
- Mouse monoclonal anti-catalase antibody (Santa Cruz Biotechnology Cat# sc-271803 RRID:AB\_10708550)
- Mouse monoclonal anti-GAPDH antibody (Sigma-Aldrich Cat# G8795, RRID:AB\_1078991)
- Mouse monoclonal anti-OPA1 antibody (Thermo Fisher Scientific Cat# MA5-16149, RRID:AB\_11153569)
- Rabbit polyclonal anti-TOM20 antibody (Santa Cruz Biotechnology Cat# sc-11415, RRID:AB\_2207533)
- Mouse monoclonal anti- $\alpha$ SMA antibody (Abcam Cat# ab7817, RRID:AB\_262054)
- Rabbit polyclonal anti-COX-IV antibody (Cell Signaling Technology Cat# 4844, RRID:AB\_2085427)
- Mouse monoclonal anti-prohibitin-2 antibody (Santa Cruz Biotechnology Cat# sc-133094, RRID:AB\_2164785)
- Rabbit polyclonal anti-total OXPHOS rodent antibodies (Abcam ab110413, RRID:AB\_2629281)
