# Supplementary material for: LIX1-mediated changes in mitochondrial metabolism control the fate of digestive mesenchyme-derived cells
Source: PubMed Central journal article supplement — Redox Biol. 2022 Aug 13;56:102431. doi: 10.1016/j.redox.2022.102431 (PMC9420520; doi:10.1016/j.redox.2022.102431), 2022-08-13
Supplement: mmc9.pdf [file mmc9.pdf]

**Supplementary Table 3: Human gene-specific primers used for RT-qPCR.**

| <b>Targets</b>      | <b>Forward primer (5'-3')</b>   | <b>Reverse primer (5'-3')</b> | <b>Amplicon (bp)</b> |
|---------------------|---------------------------------|-------------------------------|----------------------|
| <i><b>MYOCD</b></i> | ATC AAT GAA CTC ACC TGG AAA C   | GCG GCT TCT TCT CTG AAC A     | 106                  |
| <i><b>ACTA2</b></i> | TTC AAT GTC CCA GCC ATG TA      | GAA GGA ATA GCC ACG CTC AG    | 222                  |
| <i><b>ACTG2</b></i> | ATA CCC CAT TGA ACA CGG CAT     | TTA GGG GAG CCT CTG TGA GC    | 128                  |
| <i><b>CNN1</b></i>  | TCA ATG TCA GCC TGC AGA TG      | TAG TAG TTG TGT GCG TGG T     | 160                  |
| <i><b>CTGF</b></i>  | AGG AGT GGG TGT GTG AC          | CCA GGC AGT TGG CTC TAA       | 117                  |
| <i><b>CYR61</b></i> | GGA GCC TCG CAT CCT AT          | ATT GGT AAC TCG TGT GGA GA    | 115                  |
| <i><b>HBMS</b></i>  | GGC AAT GCG GCT GCA A           | GGG TAC CCA CGC GAA TCA C     | 64                   |
| <i><b>YWHAZ</b></i> | ACT TTT GGT ACA TTG TGG CTT CAA | CCG CCA GGA CAA ACC AGT AT    | 94                   |
