# Supplementary figures and images for: LIX1-mediated changes in mitochondrial metabolism control the fate of digestive mesenchyme-derived cells
Source: PubMed Central journal article supplement — Redox Biol. 2022 Aug 13;56:102431. doi: 10.1016/j.redox.2022.102431 (PMC9420520; doi:10.1016/j.redox.2022.102431), 2022-08-13

# FIGURE S1

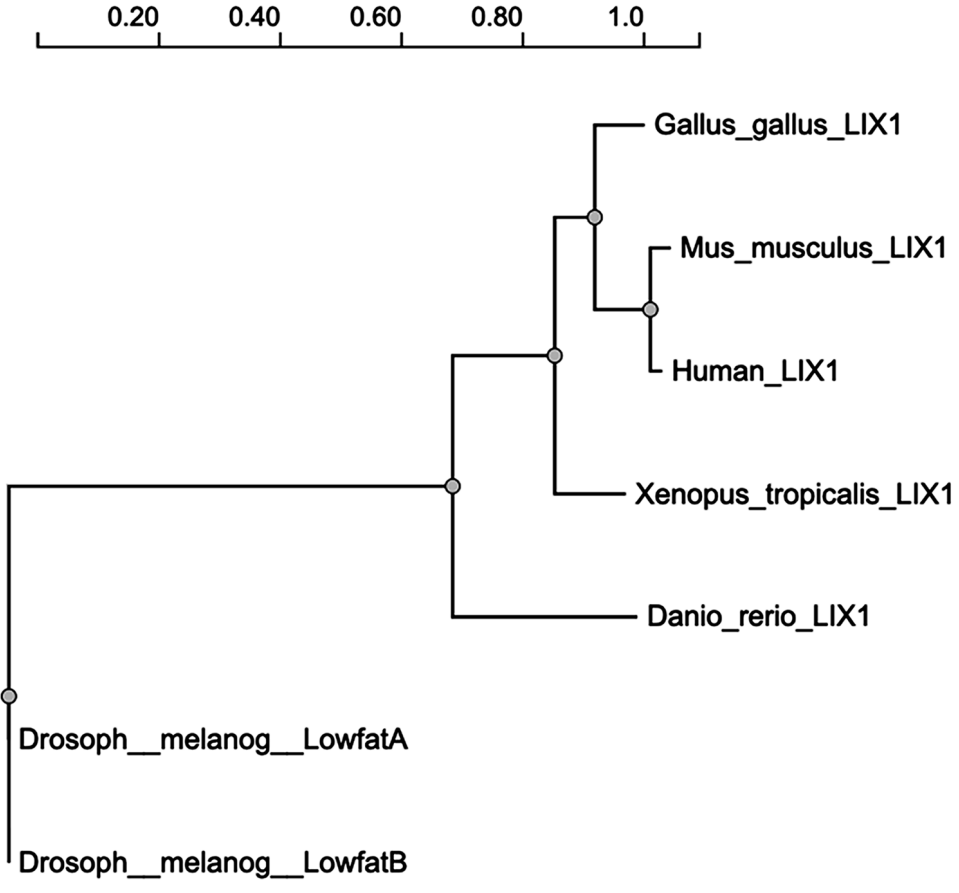

Supplement: mmc1.pdf [file mmc1.pdf]

# FIGURE S2

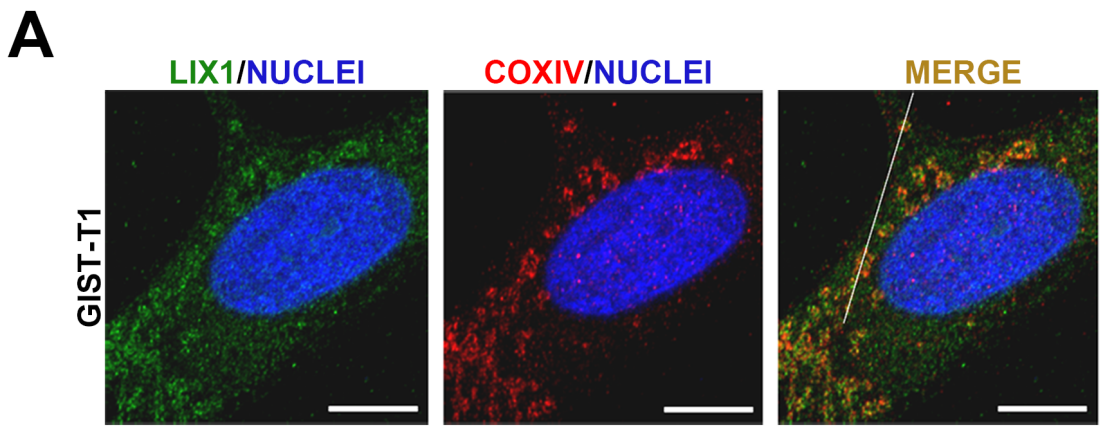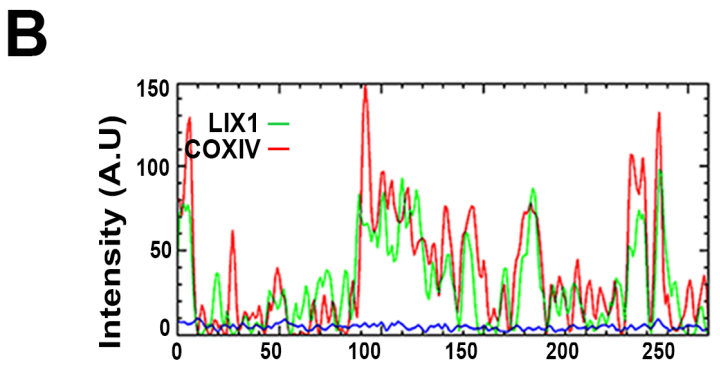

Supplement: mmc2.pdf [file mmc2.pdf]

# FIGURE S3

## A

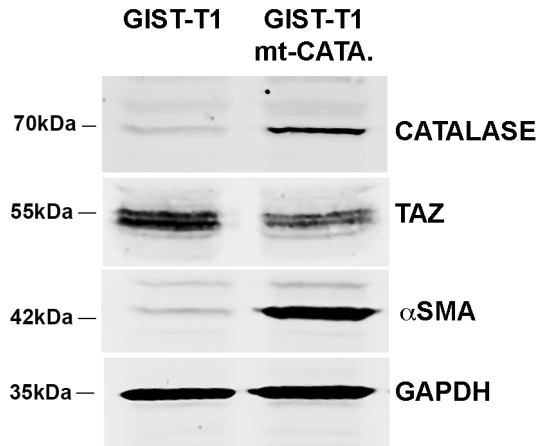

## B

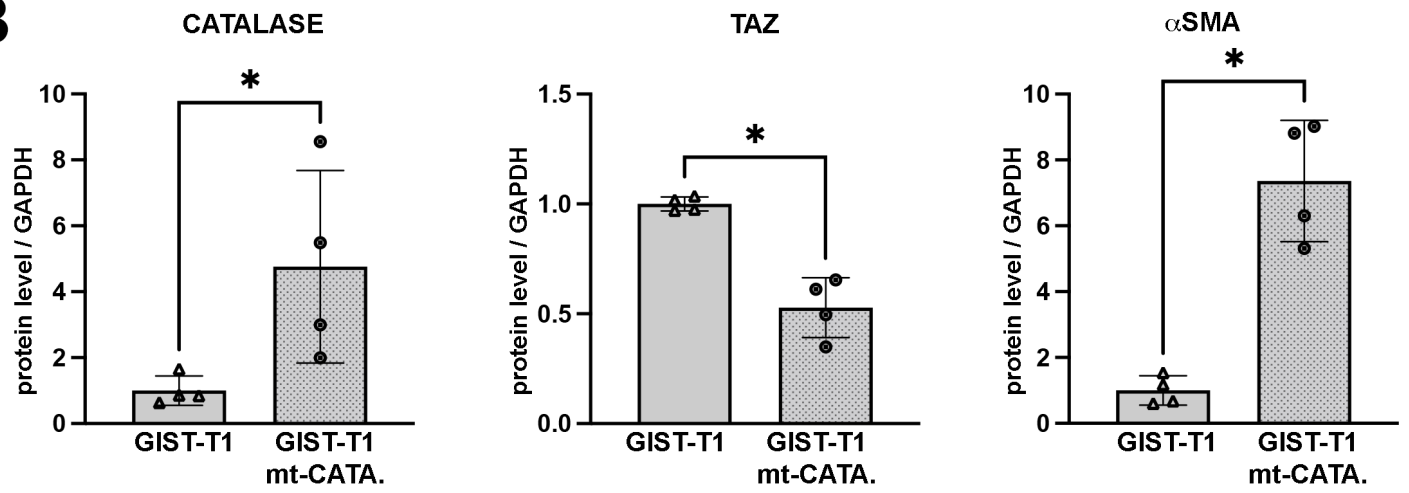

## C

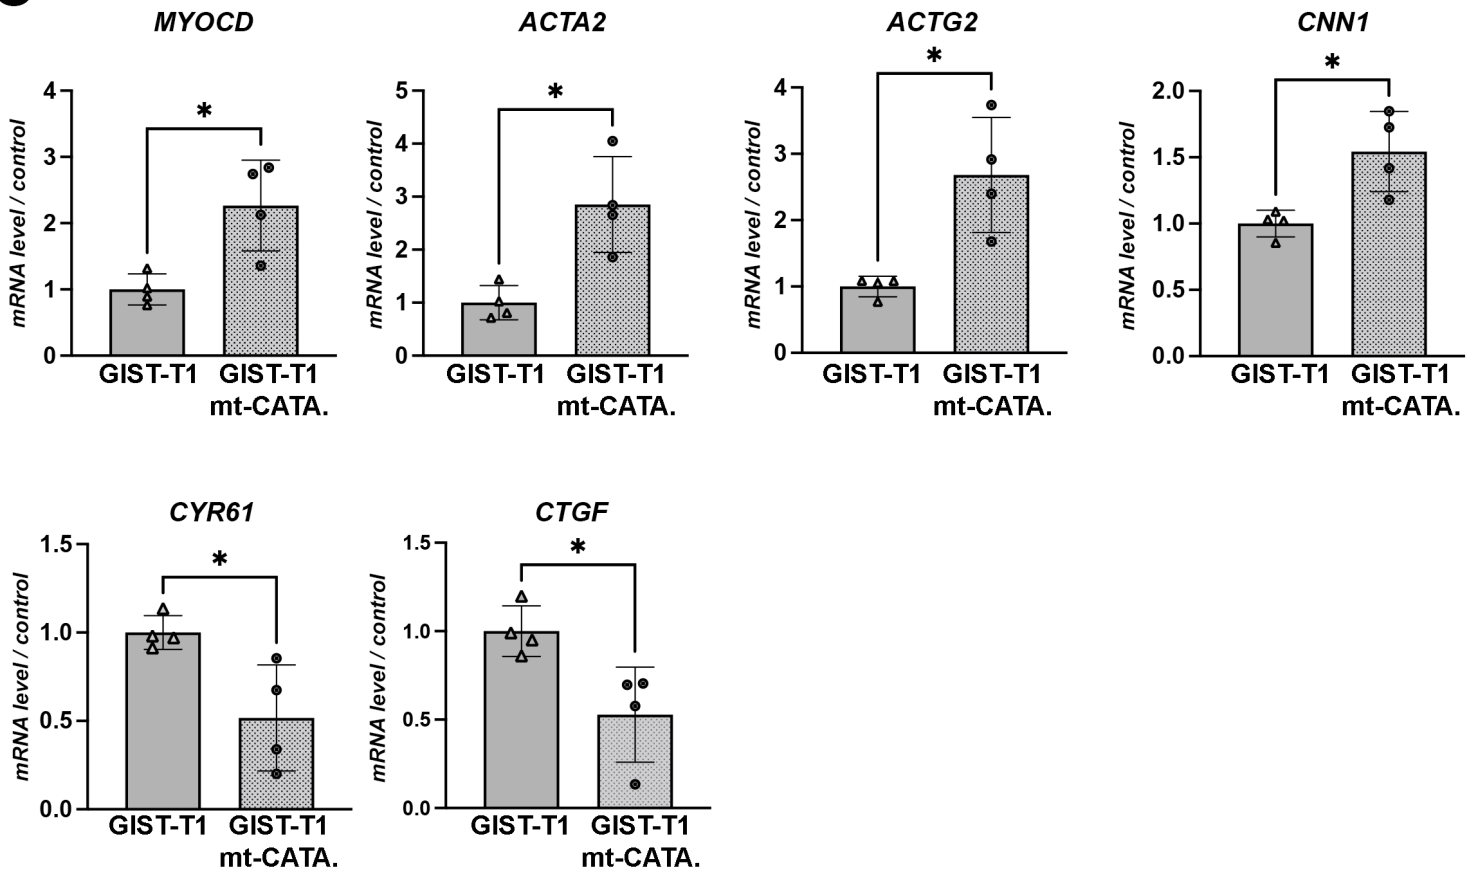

Supplement: mmc3.pdf [file mmc3.pdf]

# FIGURE S4

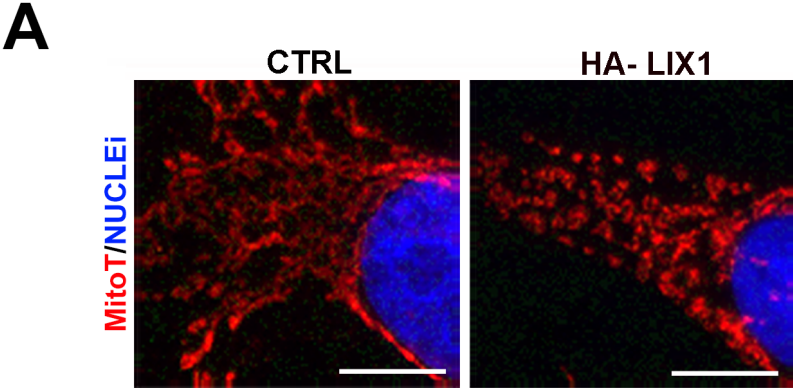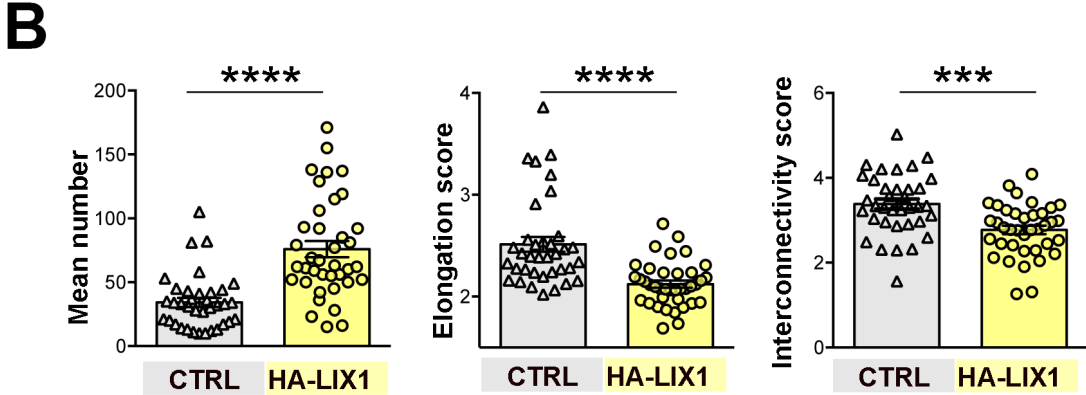

Supplement: mmc4.pdf [file mmc4.pdf]

# FIGURE S5

## A

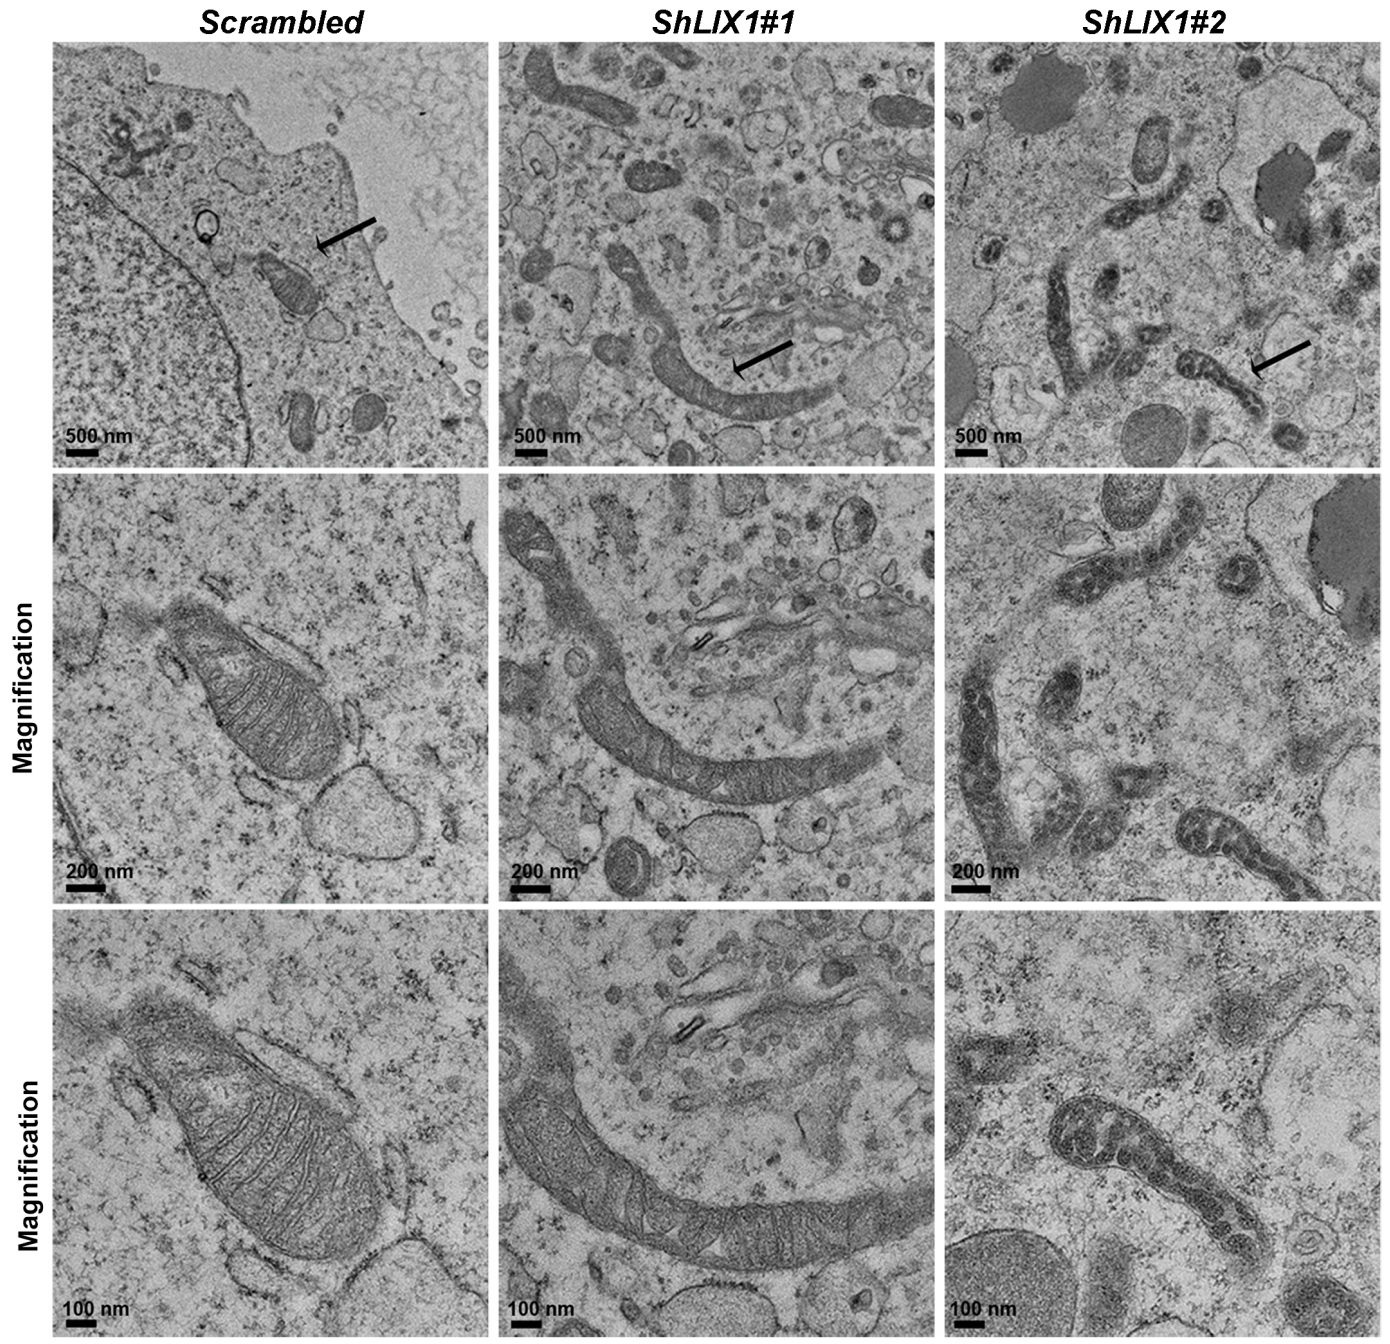

Supplement: mmc5.pdf [file mmc5.pdf]

# FIGURE S6

**A**

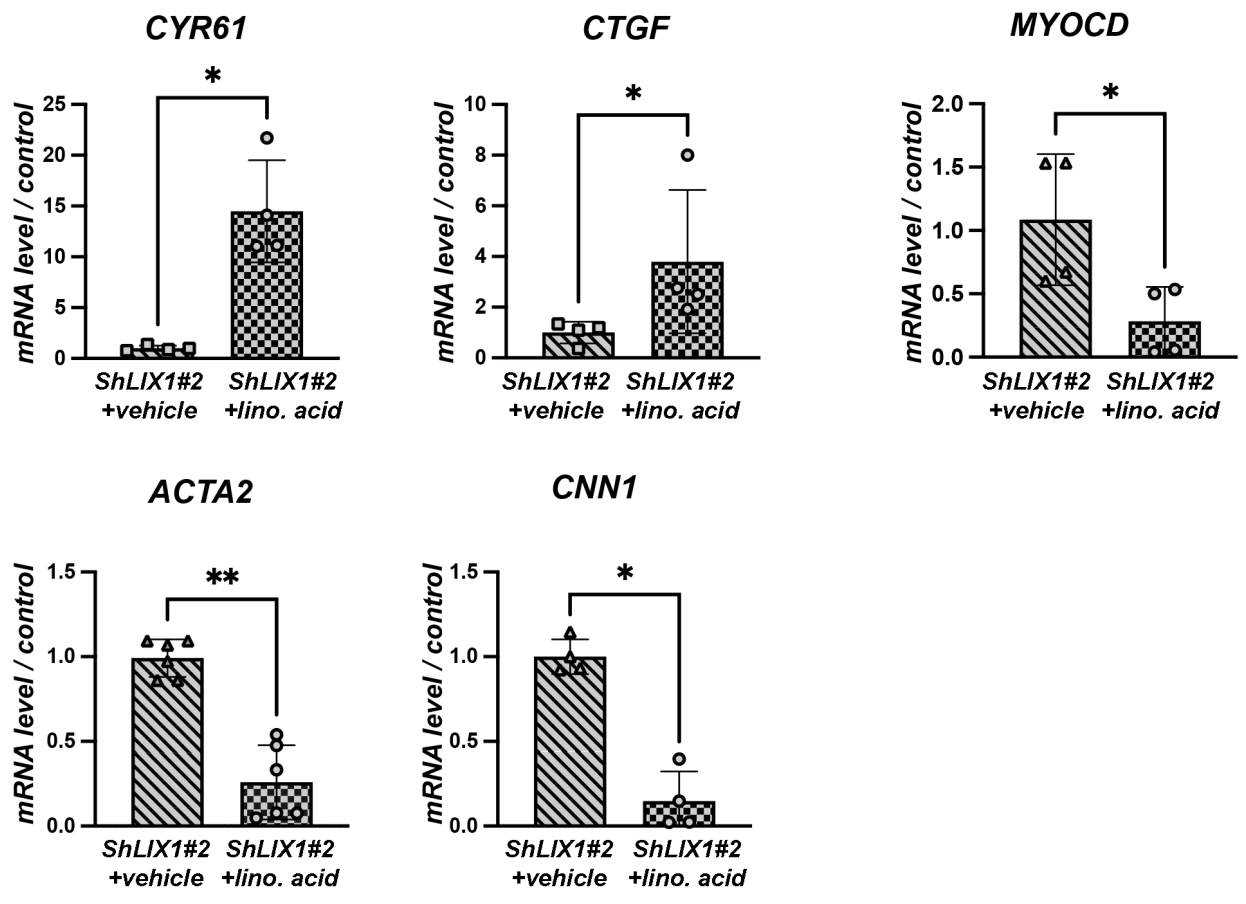

**B**

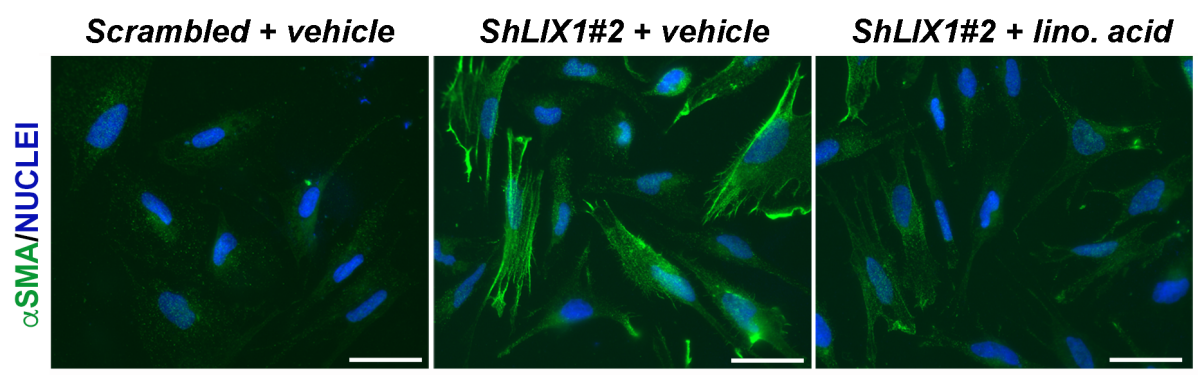

Supplement: mmc6.pdf [file mmc6.pdf]
